# Supplementary material for: Pretreatment Adherence to a Priori-Defined Dietary Patterns Is Associated with Decreased Nutrition Impact Symptom Burden in Head and Neck Cancer Survivors
Source: MDPI journal article supplement (doi:10.3390/nu13093149), 2021-09-09
Supplement: s1 [file s1]

## Supplementary Materials

**Table S1.** Pearson Correlation Coefficients ( $r$ ) matrix with the diet quality indices included in this analysis.

|                  | AHEI-2010 | aMED  | DASH  | Low-Carbohydrate |
|------------------|-----------|-------|-------|------------------|
| AHEI-2010        | --        |       |       |                  |
| aMED             | 0.73      | --    |       |                  |
| DASH             | 0.76      | 0.72  | --    |                  |
| Low-Carbohydrate | 0.13      | -0.08 | -0.06 | --               |

**Table S2.** Stratified ORs and 95% CI for associations between quintiles of *a priori* defined diet quality index scores with NIS symptom summary score  $\geq 12$  1-year post-diagnosis ( $n = 323$ ).

| BMI                                     |      |                    |                     |                     |                    |                    |                    |
|-----------------------------------------|------|--------------------|---------------------|---------------------|--------------------|--------------------|--------------------|
| Underweight/Normal Weight ( $n = 101$ ) |      |                    |                     |                     |                    |                    |                    |
| Index                                   | Q1   | Q2                 | Q3                  | Q4                  | Q5                 | $p_{\text{trend}}$ | $p_{\text{Q5-Q1}}$ |
| AHEI-2010                               | 1.00 | 1.14 (0.23–5.76)   | 0.46 (0.09–2.28)    | 0.34 (0.06–1.67)    | 0.31 (0.06–1.53)   | 0.09               | 0.16               |
| aMED                                    | 1.00 | 0.34 (0.09–1.17)   | 0.35 (0.08–1.57)    | 0.34 (0.07–1.62)    | 0.72 (0.15–3.77)   | 0.30               | 0.68               |
| DASH                                    | 1.00 | 0.35 (0.05–2.01)   | 0.04 (0.01–0.23) ** | 0.12 (0.02–0.7) *   | 0.12 (0.01–0.83) * | 0.01 *             | 0.04 *             |
| Low Carbohydrate                        | 1.00 | 1.13 (0.28–4.54)   | 0.88 (0.16–5.13)    | 0.40 (0.09–1.70)    | 0.26 (0.05–1.29)   | 0.04 *             | 0.11               |
| Overweight/Obese ( $n = 222$ )          |      |                    |                     |                     |                    |                    |                    |
| Index                                   | Q1   | Q2                 | Q3                  | Q4                  | Q5                 | $p_{\text{trend}}$ | $p_{\text{Q5-Q1}}$ |
| AHEI-2010                               | 1.00 | 0.90 (0.34–2.31)   | 1.13 (0.44–2.91)    | 0.40 (0.16–1.02)    | 0.71 (0.27–1.84)   | 0.19               | 0.49               |
| aMED                                    | 1.00 | 0.31 (0.12–0.76) * | 0.42 (0.17–1.05)    | 0.52 (0.22–1.20)    | 0.27 (0.09–0.76) * | 0.05               | 0.01 *             |
| DASH                                    | 1.00 | 0.87 (0.33–2.25)   | 0.48 (0.2–1.12)     | 0.58 (0.23–1.40)    | 0.57 (0.22–1.42)   | 0.14               | 0.23               |
| Low Carbohydrate                        | 1.00 | 1.50 (0.63–3.63)   | 1.10 (0.44–2.76)    | 0.77 (0.31–1.91)    | 1.68 (0.66–4.36)   | 0.62               | 0.28               |
| Smoking Status                          |      |                    |                     |                     |                    |                    |                    |
| Current/Former Smokers ( $n = 224$ )    |      |                    |                     |                     |                    |                    |                    |
| Index                                   | Q1   | Q2                 | Q3                  | Q4                  | Q5                 | $p_{\text{trend}}$ | $p_{\text{Q5-Q1}}$ |
| AHEI-2010                               | 1.00 | 0.60 (0.21–1.65)   | 0.32 (0.11–0.87) *  | 0.20 (0.07–0.55) ** | 0.42 (0.14–1.18)   | 0.02 *             | 0.10               |

|                  |      |                    |                     |                    |                  |        |      |
|------------------|------|--------------------|---------------------|--------------------|------------------|--------|------|
| aMED             | 1.00 | 0.38 (0.15–0.95) * | 0.26 (0.10–0.66) ** | 0.33 (0.13–0.81) * | 0.40 (0.13–1.21) | 0.04 * | 0.10 |
| DASH             | 1.00 | 0.78 (0.31–1.98)   | 0.25 (0.10–0.63) ** | 0.29 (0.11–0.75) * | 0.50 (0.18–1.38) | 0.02 * | 0.18 |
| Low Carbohydrate | 1.00 | 1.28 (0.52–3.15)   | 1.15 (0.46–2.84)    | 0.51 (0.20–1.31)   | 1.31 (0.49–3.58) | 0.82   | 0.59 |

**Nonsmokers (*n* = 99)**

| Index            | Q1   | Q2               | Q3                | Q4               | Q5               | <i>p</i> <sub>trend</sub> | <i>p</i> <sub>Q5-Q1</sub> |
|------------------|------|------------------|-------------------|------------------|------------------|---------------------------|---------------------------|
| AHEI-2010        | 1.00 | 1.90 (0.44–8.54) | 2.62 (0.66–11.25) | 0.94 (0.22–4.00) | 1.11 (0.28–4.49) | 0.86                      | 0.89                      |
| aMED             | 1.00 | 0.64 (0.18–2.22) | 1.34 (0.27–6.96)  | 0.37 (0.07–1.78) | 0.41 (0.09–1.78) | 0.21                      | 0.24                      |
| DASH             | 1.00 | 0.32 (0.07–1.33) | 0.79 (0.20–3.12)  | 0.29 (0.07–1.12) | 0.41 (0.09–1.67) | 0.18                      | 0.22                      |
| Low Carbohydrate | 1.00 | 1.72 (0.46–6.71) | 0.4 (0.08–1.82)   | 0.81 (0.22–2.95) | 0.46 (0.09–2.21) | 0.23                      | 0.34                      |

**Cancer Stage**

**Stages 0–2 (*n* = 104)**

| Index            | Q1   | Q2                 | Q3                  | Q4                 | Q5               | <i>p</i> <sub>trend</sub> | <i>p</i> <sub>Q5-Q1</sub> |
|------------------|------|--------------------|---------------------|--------------------|------------------|---------------------------|---------------------------|
| AHEI-2010        | 1.00 | 0.78 (0.19–3.14)   | 0.76 (0.17–3.37)    | 0.81 (0.19–3.48)   | 0.54 (0.1–2.66)  | 0.53                      | 0.45                      |
| aMED             | 1.00 | 0.12 (0.02–0.57) * | 0.12 (0.02–0.53) ** | 0.38 (0.09–1.46)   | 0.32 (0.05–1.80) | 0.27                      | 0.21                      |
| DASH             | 1.00 | 0.15 (0.03–0.61) * | 0.34 (0.07–1.41)    | 0.19 (0.03–0.94) * | 0.25 (0.04–1.35) | 0.13                      | 0.11                      |
| Low Carbohydrate | 1.00 | 1.55 (0.40–6.17)   | 0.66 (0.17–2.52)    | 0.71 (0.14–3.38)   | 0.71 (0.17–2.91) | 0.44                      | 0.64                      |

**Stages 3,4 (*n* = 219)**

| Index            | Q1   | Q2               | Q3               | Q4                  | Q5               | <i>p</i> <sub>trend</sub> | <i>p</i> <sub>Q5-Q1</sub> |
|------------------|------|------------------|------------------|---------------------|------------------|---------------------------|---------------------------|
| AHEI-2010        | 1.00 | 0.64 (0.23–1.71) | 0.89 (0.32–2.44) | 0.29 (0.11–0.72) ** | 0.62 (0.23–1.63) | 0.14                      | 0.33                      |
| aMED             | 1.00 | 0.61 (0.23–1.61) | 0.49 (0.20–1.12) | 0.35 (0.11–1.13)    | 0.40 (0.14–1.15) | 0.07                      | 0.09                      |
| DASH             | 1.00 | 1.09 (0.37–3.24) | 0.42 (0.16–1.06) | 0.37 (0.14–0.92) *  | 0.48 (0.16–1.44) | 0.02 *                    | 0.19                      |
| Low Carbohydrate | 1.00 | 1.43 (0.56–3.71) | 1.30 (0.52–3.28) | 0.70 (0.28–1.71)    | 1.32 (0.50–3.53) | 0.85                      | 0.58                      |

**HPV Status**

**Positive (*n* = 71)**

| Index     | Q1   | Q2                 | Q3               | Q4               | Q5               | <i>p</i> <sub>trend</sub> | <i>p</i> <sub>Q5-Q1</sub> |
|-----------|------|--------------------|------------------|------------------|------------------|---------------------------|---------------------------|
| AHEI-2010 | 1.00 | 0.06 (0.01–0.49) * | 0.46 (0.06–3.25) | 0.24 (0.02–1.73) | 0.66 (0.07–5.23) | 0.53                      | 0.69                      |
| aMED      | 1.00 | 0.02 (0–0.24) **   | 0.05 (0–0.47) *  | 0.02 (0–0.76) *  | 0.20 (0.01–2.71) | 0.41                      | 0.26                      |
| DASH      | 1.00 | 0.18 (0.02–1.21)   | 0.4 (0.06–2.43)  | 0.19 (0.03–1.14) | 0.34 (0.04–2.49) | 0.31                      | 0.29                      |

|                  |      |                   |                       |                  |                  |      |      |
|------------------|------|-------------------|-----------------------|------------------|------------------|------|------|
| Low Carbohydrate | 1.00 | 6.66 (1.09–54.64) | 12.28 (1.37–207.13) * | 2.59 (0.5–15.25) | 1.49 (0.27–8.67) | 0.80 | 0.65 |
|------------------|------|-------------------|-----------------------|------------------|------------------|------|------|

**Negative (*n* = 92)**

| <b>Index</b>     | <b>Q1</b> | <b>Q2</b>          | <b>Q3</b>        | <b>Q4</b>        | <b>Q5</b>        | <b><i>p</i><sub>trend</sub></b> | <b><i>p</i><sub>Q5-Q1</sub></b> |
|------------------|-----------|--------------------|------------------|------------------|------------------|---------------------------------|---------------------------------|
| AHEI-2010        | 1.00      | 0.14 (0.02–0.68) * | 0.36 (0.07–1.73) | 0.21 (0.04–0.97) | 0.72 (0.14–3.67) | 0.90                            | 0.69                            |
| aMED             | 1.00      | 0.42 (0.11–1.55)   | 0.66 (0.17–2.60) | 0.72 (0.13–4.17) | 0.8 (0.20–3.28)  | 0.99                            | 0.76                            |
| DASH             | 1.00      | 0.48 (0.10–2.22)   | 0.27 (0.07–1.04) | 0.48 (0.10–2.13) | 0.48 (0.09–2.54) | 0.27                            | 0.39                            |
| Low Carbohydrate | 1.00      | 2.23 (0.52–10.79)  | 0.68 (0.16–2.76) | 0.36 (0.07–1.59) | 1.04 (0.25–4.37) | 0.57                            | 0.96                            |

**Education**

**High School or Less (*n* = 91)**

| <b>Index</b>     | <b>Q1</b> | <b>Q2</b>         | <b>Q3</b>          | <b>Q4</b>          | <b>Q5</b>           | <b><i>p</i><sub>trend</sub></b> | <b><i>p</i><sub>Q5-Q1</sub></b> |
|------------------|-----------|-------------------|--------------------|--------------------|---------------------|---------------------------------|---------------------------------|
| AHEI-2010        | 1.00      | 0.30 (0.04–1.85)  | 0.33 (0.04–2.17)   | 0.29 (0.04–1.88)   | 0.05 (0.01–0.32) ** | <0.01 **                        | <0.01 **                        |
| aMED             | 1.00      | 0.17 (0.03–0.8) * | 0.16 (0.03–0.89) * | 0.23 (0.03–1.48)   | 0.01 (0–0.13) **    | <0.01 **                        | <0.01 **                        |
| DASH             | 1.00      | 0.35 (0.05–2.18)  | 0.51 (0.09–2.78)   | 0.14 (0.02–0.72) * | 0.14 (0.03–0.68) *  | 0.01 *                          | 0.02 *                          |
| Low Carbohydrate | 1.00      | 2.59 (0.48–16.76) | 0.82 (0.17–4.02)   | 1.37 (0.28–7.1)    | 0.80 (0.16–4.06)    | 0.60                            | 0.79                            |

**Some College or Greater (*n* =232)**

| <b>Index</b>     | <b>Q1</b> | <b>Q2</b>          | <b>Q3</b>        | <b>Q4</b>        | <b>Q5</b>        | <b><i>p</i><sub>trend</sub></b> | <b><i>p</i><sub>Q5-Q1</sub></b> |
|------------------|-----------|--------------------|------------------|------------------|------------------|---------------------------------|---------------------------------|
| AHEI-2010        | 1.00      | 0.96 (0.38–2.46)   | 0.67 (0.27–1.65) | 0.77 (0.31–1.93) | 1.05 (0.41–2.69) | 0.90                            | 0.92                            |
| aMED             | 1.00      | 0.48 (0.22–1.05)   | 0.71 (0.26–1.89) | 0.97 (0.34–2.81) | 0.71 (0.27–1.86) | 0.77                            | 0.48                            |
| DASH             | 1.00      | 0.36 (0.15–0.83) * | 0.48 (0.18–1.26) | 0.61 (0.24–1.53) | 0.59 (0.21–1.62) | 0.51                            | 0.31                            |
| Low Carbohydrate | 1.00      | 1.15 (0.48–2.74)   | 1.08 (0.44–2.64) | 0.5 (0.20–1.21)  | 1.07 (0.42–2.77) | 0.59                            | 0.88                            |

**Tumor Site**

**Oral Cavity (*n* = 96)**

| <b>Index</b>     | <b>Q1</b> | <b>Q2</b>          | <b>Q3</b>        | <b>Q4</b>        | <b>Q5</b>        | <b><i>p</i><sub>trend</sub></b> | <b><i>p</i><sub>Q5-Q1</sub></b> |
|------------------|-----------|--------------------|------------------|------------------|------------------|---------------------------------|---------------------------------|
| AHEI-2010        | 1.00      | 0.71 (0.16–3.17)   | 1.19 (0.26–5.65) | 1.09 (0.25–4.87) | 1.05 (0.23–4.77) | 0.76                            | 0.95                            |
| aMED             | 1.00      | 0.15 (0.03–0.7) *  | 0.29 (0.05–1.34) | 0.38 (0.08–1.62) | 0.37 (0.06–1.97) | 0.31                            | 0.25                            |
| DASH             | 1.00      | 0.18 (0.03–0.82) * | 0.77 (0.17–3.42) | 0.35 (0.06–1.82) | 0.19 (0.03–1.12) | 0.34                            | 0.08                            |
| Low Carbohydrate | 1.00      | 1.36 (0.32–5.89)   | 0.59 (0.14–2.44) | 0.81 (0.15–4.34) | 0.66 (0.15–2.91) | 0.44                            | 0.59                            |

**Oropharynx (*n* = 157)**

| Index            | Q1   | Q2               | Q3                  | Q4                 | Q5               | $p_{\text{trend}}$ | $p_{\text{Q5-Q1}}$ |
|------------------|------|------------------|---------------------|--------------------|------------------|--------------------|--------------------|
| AHEI-2010        | 1.00 | 0.71 (0.19–2.54) | 0.5 (0.14–1.66)     | 0.35 (0.1–1.17)    | 0.50 (0.14–1.72) | 0.15               | 0.28               |
| aMED             | 1.00 | 0.45 (0.14–1.35) | 0.29 (0.07–1.06)    | 0.21 (0.05–0.94) * | 0.29 (0.07–1.12) | 0.04 *             | 0.08               |
| DASH             | 1.00 | 0.56 (0.15–2.05) | 0.17 (0.05–0.53) ** | 0.35 (0.09–1.28)   | 0.30 (0.08–1.11) | 0.04 *             | 0.08               |
| Low Carbohydrate | 1.00 | 1.46 (0.46–4.87) | 1.54 (0.50–4.97)    | 0.97 (0.35–2.73)   | 0.63 (0.20–2.00) | 0.38               | 0.43               |

#### Larynx ( $n = 66$ )

| Index            | Q1   | Q2                 | Q3               | Q4                 | Q5                | $p_{\text{trend}}$ | $p_{\text{Q5-Q1}}$ |
|------------------|------|--------------------|------------------|--------------------|-------------------|--------------------|--------------------|
| AHEI-2010        | 1.00 | 0.80 (0.10–6.23)   | 0.40 (0.05–3.07) | 0.18 (0.02–1.19)   | 0.12 (0.01–0.95)  | 0.01 *             | 0.06               |
| aMED             | 1.00 | 0.45 (0.09–2.18)   | 0.32 (0.04–1.92) | 0.05 (0.00–0.63) * | 0.38 (0.04–2.89)  | 0.12               | 0.36               |
| DASH             | 1.00 | 6.40 (0.64–160.43) | 0.16 (0.02–1.02) | 0.27 (0.04–1.65)   | 1.13 (0.13–10.3)  | 0.37               | 0.91               |
| Low Carbohydrate | 1.00 | 0.83 (0.10–6.63)   | 0.63 (0.11–3.56) | 0.39 (0.03–3.44)   | 1.73 (0.26–12.95) | 0.74               | 0.58               |

#### Treatment Modality

##### Treatment Involving Radiation as Primary or Adjuvant Modality ( $n = 232$ )

| Index            | Q1   | Q2               | Q3               | Q4                 | Q5               | $p_{\text{trend}}$ | $p_{\text{Q5-Q1}}$ |
|------------------|------|------------------|------------------|--------------------|------------------|--------------------|--------------------|
| AHEI-2010        | 1.00 | 0.93 (0.35–2.48) | 0.79 (0.30–2.07) | 0.38 (0.15–0.98) * | 0.64 (0.24–1.67) | 0.13               | 0.36               |
| aMED             | 1.00 | 0.66 (0.26–1.67) | 0.73 (0.32–1.62) | 0.52 (0.16–1.73)   | 0.43 (0.16–1.16) | 0.10               | 0.10               |
| DASH             | 1.00 | 1.44 (0.53–3.94) | 0.59 (0.23–1.47) | 0.59 (0.23–1.53)   | 0.57 (0.22–1.44) | 0.07               | 0.24               |
| Low Carbohydrate | 1.00 | 1.51 (0.59–3.97) | 1.14 (0.48–2.70) | 0.69 (0.30–1.58)   | 1.71 (0.65–4.73) | 0.81               | 0.29               |

##### Treatment Not Involving Any Radiation (i.e., Surgical or Chemotherapy Alone) ( $n = 91$ )

| Index            | Q1   | Q2                  | Q3                 | Q4                  | Q5               | $p_{\text{trend}}$ | $p_{\text{Q5-Q1}}$ |
|------------------|------|---------------------|--------------------|---------------------|------------------|--------------------|--------------------|
| AHEI-2010        | 1.00 | 0.76 (0.16–3.53)    | 0.26 (0.05–1.21)   | 1.5 (0.31–7.32)     | 0.38 (0.06–2.03) | 0.46               | 0.27               |
| aMED             | 1.00 | 0.08 (0.02–0.34) ** | 0.17 (0.02–0.93) * | 0.23 (0.04–1.11)    | 0.53 (0.08–3.10) | 0.21               | 0.49               |
| DASH             | 1.00 | 0.24 (0.05–0.97)    | 0.18 (0.03–0.82) * | 0.09 (0.01–0.47) ** | 0.49 (0.09–2.61) | 0.15               | 0.4                |
| Low Carbohydrate | 1.00 | 2.73 (0.68–11.78)   | 1.14 (0.27–4.91)   | 0.48 (0.09–2.38)    | 0.33 (0.06–1.59) | 0.08               | 0.18               |

\*  $p < 0.05$

\*\*  $p < 0.01$

All models adjusted for age, cancer stage, smoking status, HPV status, total calories, and baseline NIS symptom summary score. Covariates for which models were stratified were not included in the corresponding model.

**Table S3.** ORs and 95% CI for associations between quintiles of *a priori* defined diet quality index scores with NIS symptom summary score  $\geq 12$  1-year post-diagnosis stratified on the presence of significant pretreatment NIS.

| NIS Present at Study Entry ( <i>n</i> = 251)    |      |                    |                     |                               |                   |                           |                           |
|-------------------------------------------------|------|--------------------|---------------------|-------------------------------|-------------------|---------------------------|---------------------------|
| Index                                           | Q1   | Q2                 | Q3                  | Q4                            | Q5                | <i>p</i> <sub>trend</sub> | <i>p</i> <sub>Q5-Q1</sub> |
| AHEI-2010                                       | 1.00 | 0.68 (0.27–1.67)   | 0.62 (0.25–1.52)    | 0.34 (0.13–0.82) *            | 0.57 (0.23–1.39)  | 0.09                      | 0.22                      |
| aMED                                            | 1.00 | 0.40 (0.16–0.97) * | 0.41 (0.18–0.91) *  | 0.51 (0.22–1.15)              | 0.50 (0.19–1.33)  | 0.23                      | 0.17                      |
| DASH                                            | 1.00 | 0.39 (0.15–0.96) * | 0.27 (0.11–0.63) ** | 0.33 (0.13–0.81) *            | 0.40 (0.15–1.04)  | 0.05                      | 0.06                      |
| Low Carbohydrate                                | 1.00 | 1.39 (0.60–3.28)   | 0.88 (0.38–2.07)    | 0.54 (0.23–1.25)              | 1.02 (0.42–2.47)  | 0.45                      | 0.97                      |
| NIS Not Present at Study Entry ( <i>n</i> = 72) |      |                    |                     |                               |                   |                           |                           |
| Index                                           | Q1   | Q2                 | Q3                  | Q4                            | Q5                | <i>p</i> <sub>trend</sub> | <i>p</i> <sub>Q5-Q1</sub> |
| AHEI-2010                                       | 1.00 | 1.02 (0.15–7.16)   | 0.79 (0.12–5.24)    | 0.44 (0.07–2.51)              | 0.78 (0.11–5.34)  | 0.52                      | 0.79                      |
| aMED                                            | 1.00 | 1.59 (0.19–18.36)  | 0.16 (0.02–0.81) *  | 0.20 (0.03–1.32) <sup>a</sup> | NA                | 0.11                      | 0.10 <sup>b</sup>         |
| DASH                                            | 1.00 | 0.70 (0.10–4.64)   | 0.28 (0.04–1.81)    | 0.13 (0.01–0.98)              | 0.24 (0.03–1.72)  | 0.06                      | 0.17                      |
| Low Carbohydrate                                | 1.00 | 2.62 (0.34–24.15)  | 2.95 (0.52–19.25)   | 1.53 (0.19–13.05)             | 1.64 (0.23–13.24) | 0.67                      | 0.63                      |

\**p* < 0.05

\*\**p* < 0.01

All models adjusted for age, cancer stage, smoking status, total calories, and HPV status.

<sup>a</sup> Quartiles were used in modeling given the significant amount of ties when attempting to fit quintiles.

<sup>b</sup> Reflects *p*<sub>Q4-Q1</sub>
